# Supplementary material for: Agronomic Performances and Seed Yield Components of Lentil (Lens culinaris Medikus) Germplasm in a Semi-Arid Environment
Source: MDPI journal article supplement (doi:10.3390/agronomy14020303), 2024-01-30
Supplement: s1 [file s1]

**Table S1.** List of test accessions by country of origin, accession code (AC), and subspecies.

| SN <sup>1</sup> | Origin  | AC     | Subspecies |     |              |        |       |
|-----------------|---------|--------|------------|-----|--------------|--------|-------|
| 1               | Albania | 116052 | small      | 62  | Libya        | 111910 | small |
| 2               | Albania | 116053 | small      | 63  | Libya        | 111911 | large |
| 3               | Albania | 116054 | small      | 64  | Libya        | 111909 | small |
| 4               | Algeria | 106398 | large      | 65  | Morocco      | 112112 | large |
| 5               | Algeria | 106399 | large      | 66  | Morocco      | 112114 | large |
| 6               | Algeria | 106401 | large      | 67  | Morocco      | 112115 | large |
| 7               | Algeria | 106402 | large      | 68  | Morocco      | 112118 | large |
| 8               | Algeria | 106404 | large      | 69  | Morocco      | 112120 | large |
| 9               | Algeria | 106405 | large      | 70  | Morocco      | 112164 | large |
| 10              | Algeria | 106360 | small      | 71  | Morocco      | 112113 | small |
| 11              | Algeria | 106365 | small      | 72  | Morocco      | 112116 | small |
| 12              | Algeria | 106403 | small      | 73  | Morocco      | 112117 | small |
| 13              | Algeria | 107516 | small      | 74  | Morocco      | 112163 | small |
| 14              | Cyprus  | 112366 | large      | 75  | Spain        | 107186 | large |
| 15              | Cyprus  | 112367 | large      | 76  | Spain        | 107187 | large |
| 16              | Cyprus  | 112369 | large      | 77  | Spain        | 107188 | large |
| 17              | Cyprus  | 112377 | large      | 78  | Spain        | 107189 | large |
| 18              | Cyprus  | 112379 | large      | 79  | Spain        | 109690 | small |
| 19              | Cyprus  | 112380 | large      | 80  | Spain        | 109691 | small |
| 20              | Cyprus  | 112370 | small      | 81  | Tunisia      | 106673 | large |
| 21              | Cyprus  | 112374 | small      | 82  | Tunisia      | 106676 | large |
| 22              | Cyprus  | 112375 | small      | 83  | Tunisia      | 106688 | large |
| 23              | Cyprus  | 112382 | small      | 84  | Tunisia      | 106699 | large |
| 24              | Egypt   | 110830 | small      | 85  | Tunisia      | 106754 | large |
| 25              | Egypt   | 110832 | small      | 86  | Tunisia      | 106763 | large |
| 26              | Egypt   | 110833 | small      | 87  | Tunisia      | 106679 | small |
| 27              | Egypt   | 110834 | small      | 88  | Tunisia      | 106682 | small |
| 28              | Egypt   | 110835 | small      | 89  | Tunisia      | 106692 | small |
| 29              | Egypt   | 111660 | small      | 90  | Tunisia      | 106729 | small |
| 30              | Egypt   | 111662 | small      | 01  | Tunisia      | 106743 | small |
| 31              | Egypt   | 111664 | small      | 92  | Tunisia      | 106746 | small |
| 32              | Egypt   | 111819 | small      | 93  | Tunisia      | 106748 | small |
| 33              | Egypt   | 111820 | small      | 94  | Iran         | 106286 | small |
| 34              | Greece  | 107574 | large      | 95  | Iran         | 106287 | small |
| 35              | Greece  | 107565 | small      | 96  | Nepal        | 109605 | small |
| 36              | Greece  | 107585 | small      | 97  | Nepal        | 109606 | small |
| 37              | Greece  | 110336 | small      | 98  | Pakistan     | 107385 | small |
| 38              | Italy   | 103215 | large      | 99  | Pakistan     | 107386 | small |
| 39              | Italy   | 106892 | large      | 100 | Pakistan     | 107390 | small |
| 40              | Italy   | 106899 | large      | 101 | Pakistan     | 107396 | small |
| 41              | Italy   | 110287 | large      | 102 | Pakistan     | 107400 | small |
| 42              | Italy   | 110288 | large      | 103 | Pakistan     | 107409 | small |
| 43              | Italy   | 110438 | large      | 104 | Pakistan     | 107410 | small |
| 44              | Italy   | 110918 | large      | 105 | Pakistan     | 107420 | small |
| 45              | Italy   | 111863 | large      | 106 | Pakistan     | 107424 | small |
| 46              | Italy   | 103653 | small      | 107 | Pakistan     | 107425 | small |
| 47              | Italy   | 106665 | small      | 108 | Ethiopia     | 103504 | small |
| 48              | Italy   | 110290 | small      | 109 | Ethiopia     | 106309 | small |
| 49              | Italy   | 111106 | small      | 110 | Ethiopia     | 106312 | small |
| 50              | Italy   | 111849 | small      | 111 | Ethiopia     | 106315 | small |
| 51              | Italy   | 111854 | small      | 112 | Ethiopia     | 106321 | small |
| 52              | Italy   | 112253 | small      | 113 | Ethiopia     | 106322 | small |
| 53              | Italy   | 113060 | small      | 114 | Ethiopia     | 106325 | small |
| 54              | Italy   | 115108 | small      | 115 | Ethiopia     | 106353 | small |
| 55              | Italy   | 115109 | small      | 116 | Ethiopia     | 103593 | small |
| 56              | Italy   | 115496 | small      | 117 | South Africa | 115437 | small |
| 57              | Italy   | 115963 | small      | 118 | ICARDA       | 7535   | small |
| 58              | Italy   | 116218 | small      | 119 | ICARDA       | 7202   | small |
| 59              | Italy   | 116219 | small      | 120 | USA          | Eston  | small |
| 60              | Italy   | 116221 | small      | 121 | Canada       | Laird  | large |
| 61              | Italy   | 116222 | small      |     |              |        |       |

<sup>1</sup> SN = sequence number.

**Table S2a.** Bio agronomic and quality characteristics of genotypes sampled by country of origin and by year (average values).

| Origin       | NP (no m <sup>-2</sup> ) |     |      | GY (t ha <sup>-1</sup> ) |      |      | BY (t ha <sup>-1</sup> ) |      |      | DASF (dd) |     |      | DASM (dd) |     |      | PH (cm) |      |      |
|--------------|--------------------------|-----|------|--------------------------|------|------|--------------------------|------|------|-----------|-----|------|-----------|-----|------|---------|------|------|
|              | Year                     |     |      | Year                     |      |      | Year                     |      |      | Year      |     |      | Year      |     |      | Year    |      |      |
|              | 1                        | 2   | Mean | 1                        | 2    | Mean | 1                        | 2    | Mean | 1         | 2   | Mean | 1         | 2   | Mean | 1       | 2    | Mean |
| Albania      | 183                      | 180 | 182  | 2.03                     | 1.74 | 1.89 | 6.72                     | 6.43 | 6.58 | 130       | 129 | 129  | 184       | 178 | 181  | 41.3    | 40.7 | 41.0 |
| Algeria      | 189                      | 186 | 188  | 2.57                     | 2.32 | 2.44 | 7.34                     | 7.13 | 7.23 | 118       | 116 | 117  | 173       | 175 | 174  | 45.5    | 45.6 | 45.5 |
| Cyprus       | 184                      | 189 | 187  | 2.65                     | 2.40 | 2.53 | 7.09                     | 6.93 | 7.01 | 116       | 111 | 113  | 174       | 175 | 174  | 43.4    | 43.6 | 43.5 |
| Egypt        | 195                      | 192 | 194  | 2.61                     | 2.78 | 2.69 | 7.00                     | 6.66 | 6.83 | 115       | 111 | 113  | 167       | 174 | 171  | 44.1    | 41.1 | 42.6 |
| Ethiopia     | 191                      | 190 | 190  | 2.15                     | 2.26 | 2.20 | 5.74                     | 5.26 | 5.50 | 109       | 105 | 107  | 163       | 172 | 168  | 38.4    | 35.6 | 37.0 |
| Greece       | 185                      | 188 | 187  | 2.16                     | 2.24 | 2.20 | 7.12                     | 7.11 | 7.12 | 121       | 119 | 120  | 177       | 177 | 177  | 47.6    | 46.2 | 46.9 |
| Iran         | 186                      | 190 | 188  | 2.72                     | 2.27 | 2.49 | 6.71                     | 6.51 | 6.61 | 116       | 118 | 117  | 170       | 175 | 173  | 40.8    | 40.5 | 40.6 |
| Italy        | 188                      | 182 | 185  | 1.98                     | 2.00 | 1.99 | 7.30                     | 6.83 | 7.06 | 123       | 121 | 122  | 179       | 179 | 179  | 46.9    | 45.4 | 46.1 |
| Libya        | 189                      | 184 | 186  | 2.10                     | 2.07 | 2.08 | 6.93                     | 6.57 | 6.75 | 118       | 115 | 116  | 175       | 179 | 177  | 43.5    | 39.9 | 41.7 |
| Morocco      | 188                      | 187 | 187  | 2.27                     | 2.26 | 2.27 | 7.30                     | 6.91 | 7.10 | 117       | 117 | 117  | 178       | 179 | 178  | 46.9    | 47.5 | 47.2 |
| Nepal        | 188                      | 191 | 189  | 2.72                     | 2.39 | 2.56 | 5.10                     | 4.82 | 4.96 | 113       | 111 | 112  | 168       | 175 | 171  | 31.0    | 30.4 | 30.7 |
| Pakistan     | 184                      | 188 | 186  | 2.45                     | 2.05 | 2.25 | 5.99                     | 5.79 | 5.89 | 122       | 119 | 120  | 171       | 175 | 173  | 37.7    | 34.8 | 36.2 |
| Spain        | 183                      | 181 | 182  | 1.97                     | 1.81 | 1.89 | 7.40                     | 6.95 | 7.18 | 124       | 121 | 122  | 181       | 180 | 180  | 46.8    | 45.2 | 46.0 |
| South Africa | 177                      | 186 | 181  | 1.53                     | 1.67 | 1.60 | 5.37                     | 5.19 | 5.28 | 124       | 125 | 125  | 177       | 183 | 180  | 35.5    | 31.0 | 33.3 |
| Tunisia      | 188                      | 189 | 188  | 2.42                     | 2.31 | 2.36 | 7.02                     | 6.67 | 6.85 | 118       | 116 | 117  | 174       | 178 | 176  | 44.2    | 43.5 | 43.8 |
| ICARDA       | 194                      | 196 | 195  | 3.02                     | 2.93 | 2.97 | 6.89                     | 6.18 | 6.54 | 114       | 110 | 112  | 174       | 177 | 175  | 42.0    | 39.2 | 40.6 |
| Varieties    | 190                      | 186 | 188  | 2.03                     | 1.70 | 1.86 | 7.18                     | 6.87 | 7.03 | 129       | 125 | 127  | 186       | 183 | 184  | 49.0    | 53.0 | 51.0 |
| Mean         | 188                      | 187 | 187  | 2.31                     | 2.22 | 2.26 | 6.91                     | 6.57 | 6.74 | 119       | 116 | 118  | 174       | 177 | 176  | 43.9    | 42.6 | 43.2 |

Abbreviations: NP = plant density; GY = grain yield; BY = biological yield; DASF = flowering, days after sowing; DASM = maturity, days after sowing; PH = plant height.

**Table S2b.** Bio agronomic and quality characteristics of genotypes sampled by country of origin and by year (average values).

| Origin       | FPH (cm) |      |      | PP (no) |      |      | SP (no) |      |      | GYP (g d.m.) |      |      | TSW (g) |      |      | GP (% d.m.) |      |      |
|--------------|----------|------|------|---------|------|------|---------|------|------|--------------|------|------|---------|------|------|-------------|------|------|
|              | Year     |      |      | Year    |      |      | Year    |      |      | Year         |      |      | Year    |      |      | Year        |      |      |
|              | 1        | 2    | Mean | 1       | 2    | Mean | 1       | 2    | Mean | 1            | 2    | Mean | 1       | 2    | Mean | 1           | 2    | Mean |
| Albania      | 27.2     | 29.1 | 28.2 | 42.5    | 39.5 | 41.0 | 1.24    | 1.22 | 1.23 | 1.10         | 1.01 | 1.05 | 23.7    | 24.7 | 24.2 | 29.8        | 30.0 | 29.9 |
| Algeria      | 29.9     | 33.6 | 31.8 | 32.7    | 30.4 | 31.6 | 1.32    | 1.30 | 1.31 | 1.37         | 1.25 | 1.31 | 47.0    | 45.7 | 46.4 | 27.5        | 27.7 | 27.6 |
| Cyprus       | 28.5     | 28.0 | 28.2 | 29.9    | 27.8 | 28.9 | 1.14    | 1.12 | 1.13 | 1.26         | 1.15 | 1.20 | 49.8    | 47.1 | 48.4 | 28.2        | 28.4 | 28.3 |
| Egypt        | 29.0     | 25.2 | 27.1 | 45.5    | 42.3 | 43.9 | 1.37    | 1.35 | 1.36 | 1.17         | 1.07 | 1.12 | 26.3    | 24.1 | 25.2 | 28.5        | 28.7 | 28.6 |
| Ethiopia     | 25.3     | 24.0 | 24.6 | 27.4    | 24.5 | 25.9 | 0.97    | 1.00 | 0.99 | 0.70         | 0.59 | 0.64 | 31.4    | 27.8 | 29.6 | 26.4        | 26.7 | 26.6 |
| Greece       | 31.3     | 31.7 | 31.5 | 29.0    | 27.0 | 28.0 | 1.17    | 1.15 | 1.16 | 0.97         | 0.88 | 0.92 | 34.9    | 34.2 | 34.5 | 27.6        | 27.8 | 27.7 |
| Iran         | 26.8     | 23.0 | 24.9 | 38.9    | 36.2 | 37.5 | 1.34    | 1.32 | 1.33 | 1.48         | 1.36 | 1.42 | 33.2    | 31.3 | 32.2 | 27.3        | 27.5 | 27.4 |
| Italy        | 30.8     | 31.2 | 31.0 | 25.4    | 23.6 | 24.5 | 1.15    | 1.13 | 1.14 | 0.86         | 0.78 | 0.82 | 39.2    | 39.3 | 39.3 | 28.0        | 28.2 | 28.1 |
| Libya        | 28.6     | 26.0 | 27.3 | 24.1    | 22.4 | 23.3 | 1.16    | 1.14 | 1.15 | 1.00         | 0.92 | 0.96 | 41.2    | 39.4 | 40.3 | 28.6        | 28.8 | 28.7 |
| Morocco      | 30.8     | 33.7 | 32.3 | 26.3    | 24.5 | 25.4 | 1.17    | 1.15 | 1.16 | 1.02         | 0.93 | 0.98 | 42.8    | 41.4 | 42.1 | 27.4        | 27.6 | 27.5 |
| Nepal        | 20.4     | 20.6 | 20.5 | 38.9    | 36.1 | 37.5 | 1.70    | 1.68 | 1.69 | 1.37         | 1.26 | 1.31 | 22.4    | 19.8 | 21.1 | 26.0        | 26.2 | 26.1 |
| Pakistan     | 24.8     | 22.7 | 23.7 | 40.7    | 37.9 | 39.3 | 1.49    | 1.47 | 1.48 | 1.16         | 1.07 | 1.11 | 21.9    | 21.1 | 21.5 | 27.3        | 27.5 | 27.4 |
| Spain        | 30.8     | 31.9 | 31.3 | 26.6    | 24.7 | 25.7 | 1.02    | 1.00 | 1.01 | 0.97         | 0.89 | 0.93 | 48.8    | 49.4 | 49.1 | 26.9        | 27.1 | 27.0 |
| South Africa | 23.4     | 23.8 | 23.6 | 25.8    | 30.9 | 28.4 | 1.45    | 1.06 | 1.25 | 0.55         | 0.54 | 0.54 | 19.1    | 20.5 | 19.8 | 28.1        | 29.1 | 28.6 |
| Tunisia      | 29.1     | 28.4 | 28.7 | 35.8    | 33.3 | 34.5 | 1.35    | 1.33 | 1.34 | 1.19         | 1.09 | 1.14 | 38.5    | 37.4 | 38.0 | 27.5        | 27.9 | 27.7 |
| ICARDA       | 27.6     | 23.4 | 25.5 | 34.1    | 31.2 | 32.6 | 1.21    | 1.08 | 1.14 | 1.54         | 1.20 | 1.37 | 39.7    | 38.5 | 39.1 | 29.8        | 30.3 | 30.1 |
| Varieties    | 32.2     | 31.1 | 31.7 | 31.9    | 32.5 | 32.2 | 1.00    | 1.06 | 1.03 | 1.10         | 1.20 | 1.06 | 47.9    | 48.7 | 48.3 | 29.3        | 28.5 | 28.9 |

|      |      |      |      |      |      |      |      |      |      |      |      |      |      |      |      |      |      |      |
|------|------|------|------|------|------|------|------|------|------|------|------|------|------|------|------|------|------|------|
| Mean | 28.9 | 28.8 | 28.7 | 31.9 | 29.7 | 30.8 | 1.23 | 1.21 | 1.22 | 1.07 | 0.98 | 1.02 | 37.5 | 36.3 | 36.9 | 27.7 | 27.9 | 27.8 |
|------|------|------|------|------|------|------|------|------|------|------|------|------|------|------|------|------|------|------|

Abbreviations: FPH = First pod height ; PP = pods per plant; SP = seeds per pod; GYP = grain yield per plant; TSW = thousand seed weight; GP = grain protein content.

**Table S3a.** Bio agronomic and quality characteristics of genotypes sampled by country of origin, by year, and subspecies *microsperma* (S) and *macrosperma* (L) (average values).

| Origin       | NP (no m <sup>-2</sup> ) |     |     |      |      |     | GY (t ha <sup>-1</sup> ) |      |      |      |      |      | BY (t ha <sup>-1</sup> ) |      |      |      |      |      | DASF (dd)         |     |     |      |      |     |
|--------------|--------------------------|-----|-----|------|------|-----|--------------------------|------|------|------|------|------|--------------------------|------|------|------|------|------|-------------------|-----|-----|------|------|-----|
|              | Year / subspecies        |     |     | Mean |      |     | Year / subspecies        |      |      | Mean |      |      | Year / subspecies        |      |      | Mean |      |      | Year / subspecies |     |     | Mean |      |     |
|              | 1                        |     | 2   |      | Mean |     | 1                        |      | 2    |      | Mean |      | 1                        |      | 2    |      | Mean |      | 1                 |     | 2   |      | Mean |     |
|              | S                        | L   | S   | L    | S    | L   | S                        | L    | S    | L    | S    | L    | S                        | L    | S    | L    | S    | L    | S                 | L   | S   | L    | S    | L   |
| Albania      | 183                      |     | 180 |      | 181  |     | 2.03                     |      | 1.74 |      | 1.89 |      | 6.72                     |      | 6.93 |      | 6.83 |      | 130               |     | 129 |      | 129  |     |
| Algeria      | 195                      | 185 | 191 | 183  | 192  | 184 | 2.76                     | 2.44 | 2.69 | 2.08 | 2.72 | 2.26 | 7.11                     | 7.49 | 6.91 | 8.11 | 7.01 | 7.80 | 117               | 119 | 115 | 116  | 116  | 118 |
| Cyprus       | 186                      | 183 | 193 | 186  | 189  | 184 | 2.97                     | 2.43 | 2.60 | 2.28 | 2.78 | 2.35 | 7.15                     | 7.05 | 7.64 | 7.30 | 7.39 | 7.17 | 115               | 117 | 111 | 111  | 113  | 114 |
| Egypt        | 195                      |     | 192 |      | 193  |     | 2.61                     |      | 2.78 |      | 2.69 |      | 7.00                     |      | 7.16 |      | 7.08 |      | 115               |     | 111 |      | 113  |     |
| \Ethiopia    | 191                      |     | 190 |      | 190  |     | 2.15                     |      | 2.26 |      | 2.20 |      | 5.74                     |      | 5.76 |      | 5.75 |      | 109               |     | 105 |      | 107  |     |
| Greece       | 186                      | 181 | 188 | 188  | 187  | 184 | 2.22                     | 2.00 | 2.32 | 2.00 | 2.27 | 2.00 | 7.31                     | 6.56 | 7.96 | 6.55 | 7.64 | 6.55 | 122               | 118 | 120 | 117  | 121  | 117 |
| Iran         | 186                      |     | 190 |      | 187  |     | 2.72                     |      | 2.27 |      | 2.49 |      | 6.71                     |      | 7.01 |      | 6.86 |      | 116               |     | 118 |      | 117  |     |
| Italy        | 192                      | 181 | 184 | 177  | 187  | 178 | 2.08                     | 1.77 | 2.09 | 1.82 | 2.08 | 1.80 | 7.42                     | 7.06 | 7.42 | 7.15 | 7.42 | 7.11 | 123               | 123 | 121 | 120  | 122  | 122 |
| Libya        | 192                      | 182 | 187 | 178  | 189  | 180 | 2.37                     | 1.56 | 2.29 | 1.62 | 2.33 | 1.59 | 6.84                     | 7.10 | 7.19 | 6.82 | 7.01 | 6.96 | 115               | 123 | 113 | 120  | 114  | 121 |
| Morocco      | 194                      | 184 | 189 | 185  | 191  | 184 | 2.41                     | 2.18 | 2.29 | 2.24 | 2.35 | 2.21 | 7.35                     | 7.26 | 7.58 | 7.30 | 7.47 | 7.28 | 117               | 118 | 117 | 117  | 117  | 117 |
| Nepal        | 188                      |     | 191 |      | 189  |     | 2.72                     |      | 2.39 |      | 2.56 |      | 5.10                     |      | 5.32 |      | 5.21 |      | 113               |     | 111 |      | 112  |     |
| Pakistan     | 184                      |     | 188 |      | 186  |     | 2.45                     |      | 2.05 |      | 2.25 |      | 5.99                     |      | 6.29 |      | 6.14 |      | 122               |     | 119 |      | 120  |     |
| Spain        | 188                      | 181 | 191 | 177  | 189  | 179 | 2.28                     | 1.81 | 1.85 | 1.79 | 2.07 | 1.80 | 7.24                     | 7.48 | 7.42 | 7.47 | 7.33 | 7.48 | 129               | 122 | 120 | 121  | 124  | 122 |
| South Africa | 177                      |     | 186 |      | 181  |     | 1.53                     |      | 1.67 |      | 1.60 |      | 5.37                     |      | 5.69 |      | 5.53 |      | 124               |     | 125 |      | 125  |     |
| Tunisia      | 190                      | 185 | 196 | 181  | 192  | 183 | 2.95                     | 1.80 | 2.65 | 1.91 | 2.80 | 1.85 | 6.89                     | 7.19 | 7.14 | 7.21 | 7.01 | 7.20 | 115               | 121 | 113 | 119  | 114  | 120 |
| ICARDA       | 194                      |     | 196 |      | 195  |     | 3.01                     |      | 2.93 |      | 2.97 |      | 6.88                     |      | 6.68 |      | 6.78 |      | 114               |     | 110 |      | 112  |     |
| Varieties    | 194                      | 187 | 182 | 189  | 188  | 187 | 1.95                     | 2.11 | 1.62 | 1.77 | 1.79 | 1.94 | 6.31                     | 8.06 | 6.17 | 8.58 | 6.24 | 8.32 | 127               | 130 | 123 | 127  | 125  | 128 |
| Mean         | 190                      | 183 | 189 | 182  | 189  | 182 | 2.42                     | 2.01 | 2.26 | 1.95 | 2.34 | 1.98 | 6.76                     | 7.23 | 6.92 | 7.40 | 6.84 | 7.31 | 118               | 120 | 115 | 118  | 117  | 119 |

Abbreviations: NP = plant density; GY = grain yield; BY = biological yield; DASF = flowering, days after sowing.

**Table S3b.** Bio agronomic and quality characteristics of genotypes sampled by country of origin, by year, and subspecies *microsperma* (S) and *macrosperma* (L) (average values).

| Origin   | DASM (dd)         |     |     |      |      |     | PH (cm)           |      |      |      |      |      | FPH (cm)          |      |      |      |      |      | PP (no)           |      |      |      |      |      |
|----------|-------------------|-----|-----|------|------|-----|-------------------|------|------|------|------|------|-------------------|------|------|------|------|------|-------------------|------|------|------|------|------|
|          | Year / subspecies |     |     | Mean |      |     | Year / subspecies |      |      | Mean |      |      | Year / subspecies |      |      | Mean |      |      | Year / subspecies |      |      | Mean |      |      |
|          | 1                 |     | 2   |      | Mean |     | 1                 |      | 2    |      | Mean |      | 1                 |      | 2    |      | Mean |      | 1                 |      | 2    |      | Mean |      |
|          | S                 | L   | S   | L    | S    | L   | S                 | L    | S    | L    | S    | L    | S                 | L    | S    | L    | S    | L    | S                 | L    | S    | L    | S    | L    |
| Albania  | 184               |     | 178 |      | 181  |     | 41.3              |      | 40.7 |      | 41.0 |      | 27.2              |      | 29.1 |      | 28.2 |      | 42.5              |      | 39.5 |      | 41.0 |      |
| Algeria  | 171               | 174 | 176 | 174  | 174  | 174 | 42.0              | 47.8 | 42.1 | 48.0 | 42.1 | 47.9 | 27.6              | 31.4 | 28.6 | 36.9 | 28.1 | 34.2 | 42.6              | 26.2 | 39.6 | 24.3 | 41.1 | 25.2 |
| Cyprus   | 173               | 174 | 175 | 175  | 174  | 175 | 42.8              | 43.8 | 41.9 | 44.7 | 42.3 | 44.2 | 28.1              | 28.8 | 26.7 | 28.8 | 27.4 | 28.8 | 33.0              | 27.9 | 30.7 | 26.0 | 31.8 | 26.9 |
| Egypt    | 167               |     | 174 |      | 171  |     | 44.1              |      | 41.1 |      | 42.6 |      | 29.0              |      | 25.2 |      | 27.1 |      | 45.5              |      | 42.3 |      | 43.9 |      |
| Ethiopia | 163               |     | 172 |      | 168  |     | 38.4              |      | 35.6 |      | 37.0 |      | 25.3              |      | 24.0 |      | 24.6 |      | 27.4              |      | 24.5 |      | 25.9 |      |
| Greece   | 177               | 177 | 178 | 176  | 177  | 176 | 48.3              | 45.5 | 47.5 | 42.3 | 47.9 | 43.9 | 31.8              | 29.9 | 32.4 | 29.6 | 32.1 | 29.8 | 24.6              | 42.2 | 22.8 | 39.3 | 23.7 | 40.8 |
| Iran     | 170               |     | 175 |      | 173  |     | 40.8              |      | 40.5 |      | 40.6 |      | 26.8              |      | 23.0 |      | 24.9 |      | 38.9              |      | 36.2 |      | 37.5 |      |
| Italy    | 179               | 181 | 180 | 176  | 179  | 179 | 46.8              | 47.0 | 45.3 | 45.6 | 46.0 | 46.3 | 30.8              | 30.9 | 31.0 | 31.6 | 30.9 | 31.3 | 28.8              | 18.7 | 26.7 | 17.4 | 27.8 | 18.0 |
| Libya    | 171               | 183 | 177 | 183  | 174  | 183 | 43.5              | 43.5 | 38.8 | 42.3 | 41.1 | 42.9 | 28.6              | 28.6 | 26.1 | 25.9 | 27.3 | 27.3 | 24.6              | 23.1 | 22.9 | 21.5 | 23.8 | 22.3 |
| Morocco  | 176               | 179 | 179 | 179  | 177  | 179 | 46.6              | 47.0 | 48.2 | 47.0 | 47.4 | 47.0 | 30.7              | 30.9 | 34.9 | 32.9 | 32.8 | 31.9 | 30.2              | 23.7 | 28.1 | 22.1 | 29.2 | 22.9 |
| Nepal    | 168               |     | 175 |      | 171  |     | 31.0              |      | 30.4 |      | 30.7 |      | 20.4              |      | 20.6 |      | 20.5 |      | 38.9              |      | 36.1 |      | 37.5 |      |

|              |     |     |     |     |     |     |      |      |      |      |      |      |      |      |      |      |      |      |      |      |      |      |      |      |
|--------------|-----|-----|-----|-----|-----|-----|------|------|------|------|------|------|------|------|------|------|------|------|------|------|------|------|------|------|
| Pakistan     | 171 |     | 175 |     | 173 |     | 37.7 |      | 34.8 |      | 36.2 |      | 24.8 |      | 22.7 |      | 23.7 |      | 40.7 |      | 37.9 |      | 39.3 |      |
| Spain        | 182 | 180 | 181 | 180 | 181 | 180 | 47.8 | 46.4 | 45.7 | 45.0 | 46.7 | 45.7 | 31.4 | 30.5 | 29.2 | 33.2 | 30.3 | 31.9 | 40.7 | 19.5 | 37.8 | 18.2 | 39.2 | 18.9 |
| South Africa | 177 |     | 183 |     | 180 |     | 35.5 |      | 31.0 |      | 33.3 |      | 23.4 |      | 23.8 |      | 23.6 |      | 25.8 |      | 30.9 |      | 28.4 |      |
| Tunisia      | 168 | 180 | 176 | 180 | 172 | 180 | 39.5 | 49.8 | 38.9 | 48.8 | 39.2 | 49.3 | 26.0 | 32.7 | 23.4 | 34.2 | 24.7 | 33.5 | 43.7 | 26.6 | 40.6 | 24.8 | 42.1 | 25.7 |
| ICARDA       | 174 |     | 177 |     | 175 |     | 42   |      | 39   |      | 40.6 |      | 28   |      | 23   |      | 25.5 |      | 34   |      | 31   |      | 32.6 |      |
| Varieties    | 187 | 185 | 183 | 183 | 185 | 184 | 43.0 | 55.0 | 45.1 | 60.9 | 44.1 | 57.9 | 28.3 | 36.2 | 20.4 | 29.8 | 24.3 | 33.0 | 33.2 | 30.5 | 35.8 | 29.1 | 34.5 | 29.8 |
| Mean         | 172 | 178 | 176 | 178 | 174 | 178 | 42.3 | 47.1 | 40.7 | 46.7 | 41.5 | 46.9 | 27.9 | 31.0 | 26.7 | 32.5 | 27.3 | 31.7 | 33.1 | 22.7 | 35.5 | 24.4 | 34.3 | 23.5 |

Abbreviations: DASM = maturity, days after sowing; PH = plant height; FPH = First pod height; PP = pods per plant.

**Table S3c.** Bio agronomic and quality characteristics of genotypes sampled by country of origin, by year, and subspecies *microsperma* (S) and *macrosperma* (L) (average values).

| Origin       | SP (no)           |      |        |      |      |      | GYP (g d.m.)      |      |        |      |      |      | TSW (g)           |      |        |      |      |      | GP (% d.m.)       |      |        |      |      |      |
|--------------|-------------------|------|--------|------|------|------|-------------------|------|--------|------|------|------|-------------------|------|--------|------|------|------|-------------------|------|--------|------|------|------|
|              | Year / subspecies |      |        |      |      |      | Year / subspecies |      |        |      |      |      | Year / subspecies |      |        |      |      |      | Year / subspecies |      |        |      |      |      |
|              | 1 year            |      | 2 year |      | Mean |      | 1 year            |      | 2 year |      | Mean |      | 1 year            |      | 2 year |      | Mean |      | 1 year            |      | 2 year |      | Mean |      |
|              | S                 | L    | S      | L    | S    | L    | S                 | L    | S      | L    | S    | L    | S                 | L    | S      | L    | S    | L    | S                 | L    | S      | L    | S    | L    |
| Albania      | 1.24              |      | 1.22   |      | 1.23 |      | 1.10              |      | 1.01   |      | 1.05 |      | 23.7              |      | 24.7   |      | 24.2 |      | 29.8              |      | 30.0   |      | 29.9 |      |
| Algeria      | 1.66              | 1.10 | 1.64   | 1.08 | 1.65 | 1.09 | 1.35              | 1.38 | 1.24   | 1.26 | 1.29 | 1.32 | 26.1              | 61.0 | 23.6   | 60.4 | 24.8 | 60.7 | 28.2              | 27.0 | 28.4   | 27.1 | 28.3 | 27.0 |
| Cyprus       | 1.09              | 1.18 | 1.07   | 1.16 | 1.08 | 1.17 | 1.23              | 1.27 | 1.12   | 1.16 | 1.18 | 1.22 | 39.9              | 53.0 | 39.8   | 50.3 | 39.9 | 51.6 | 27.8              | 28.4 | 28.0   | 28.6 | 27.9 | 28.5 |
| Egypt        | 1.37              |      | 1.35   |      | 1.36 |      | 1.17              |      | 1.07   |      | 1.12 |      | 26.3              |      | 24.1   |      | 25.2 |      | 28.5              |      | 28.7   |      | 28.6 |      |
| Ethiopia     | 0.97              |      | 1.00   |      | 0.99 |      | 0.70              |      | 0.59   |      | 0.64 |      | 31.4              |      | 27.8   |      | 29.6 |      | 26.4              |      | 26.7   |      | 26.6 |      |
| Greece       | 1.20              | 1.10 | 1.18   | 1.08 | 1.19 | 1.09 | 0.91              | 1.13 | 0.84   | 1.03 | 0.87 | 1.08 | 30.6              | 47.6 | 30.1   | 46.3 | 30.4 | 47.0 | 27.8              | 26.7 | 28.0   | 26.9 | 27.9 | 26.8 |
| Iran         | 1.34              |      | 1.32   |      | 1.33 |      | 1.48              |      | 1.36   |      | 1.42 |      | 33.2              |      | 31.3   |      | 32.2 |      | 27.3              |      | 27.5   |      | 27.4 |      |
| Italy        | 1.23              | 0.97 | 1.21   | 0.95 | 1.22 | 0.96 | 0.92              | 0.73 | 0.84   | 0.67 | 0.88 | 0.70 | 32.4              | 52.8 | 31.9   | 54.3 | 32.2 | 53.5 | 28.3              | 27.4 | 28.5   | 27.6 | 28.4 | 27.5 |
| Libya        | 1.28              | 0.91 | 1.26   | 0.89 | 1.27 | 0.90 | 1.03              | 0.96 | 0.94   | 0.87 | 0.98 | 0.91 | 35.6              | 52.4 | 33.3   | 51.4 | 34.5 | 51.9 | 29.3              | 27.3 | 29.5   | 27.5 | 29.4 | 27.4 |
| Morocco      | 1.15              | 1.18 | 1.13   | 1.16 | 1.14 | 1.17 | 1.05              | 1.00 | 0.96   | 0.91 | 1.01 | 0.95 | 39.3              | 45.2 | 37.7   | 44.0 | 38.5 | 44.6 | 27.6              | 27.2 | 27.8   | 27.4 | 27.7 | 27.3 |
| Nepal        | 1.70              |      | 1.68   |      | 1.69 |      | 1.37              |      | 1.26   |      | 1.31 |      | 22.4              |      | 19.8   |      | 21.1 |      | 26.0              |      | 26.2   |      | 26.1 |      |
| Pakistan     | 1.49              |      | 1.47   |      | 1.48 |      | 1.16              |      | 1.07   |      | 1.11 |      | 21.9              |      | 21.1   |      | 21.5 |      | 27.3              |      | 27.5   |      | 27.4 |      |
| Spain        | 1.22              | 0.91 | 1.20   | 0.89 | 1.21 | 0.90 | 1.04              | 0.94 | 0.95   | 0.86 | 0.99 | 0.90 | 25.7              | 60.4 | 25.6   | 61.3 | 25.7 | 60.8 | 27.3              | 26.8 | 27.5   | 27.0 | 27.4 | 26.9 |
| South Africa | 1.45              |      | 1.06   |      | 1.25 |      | 0.55              |      | 0.54   |      | 0.54 |      | 19.1              |      | 20.5   |      | 19.8 |      | 28.1              |      | 29.1   |      | 28.6 |      |
| Tunisia      | 1.66              | 0.98 | 1.64   | 0.96 | 1.65 | 0.97 | 1.28              | 1.07 | 1.18   | 0.97 | 1.23 | 1.02 | 22.6              | 57.1 | 20.4   | 57.4 | 21.5 | 57.2 | 27.7              | 27.1 | 28.4   | 27.3 | 28.1 | 27.2 |
| ICARDA       | 1.21              | 0.00 | 1.08   |      | 1.14 |      | 1.54              |      | 1.20   |      | 1.37 |      | 39.7              |      | 38.5   |      | 39.1 |      | 29.8              |      | 30.3   |      | 30.1 |      |
| Varieties    | 1.08              | 0.93 | 1.13   | 1.00 | 1.10 | 0.96 | 0.59              | 1.22 | 1.53   | 0.92 | 1.06 | 1.07 | 29.9              | 65.9 | 30.7   | 66.7 | 30.3 | 66.3 | 28.8              | 29.8 | 29.6   | 27.3 | 29.2 | 28.6 |
| Mean         | 1.31              | 1.05 | 1.29   | 1.03 | 1.30 | 1.04 | 1.07              | 1.06 | 0.98   | 0.96 | 1.03 | 1.01 | 29.4              | 55.0 | 28.3   | 54.7 | 28.8 | 54.8 | 27.9              | 27.4 | 28.2   | 27.5 | 28.0 | 27.5 |

Abbreviations: SP = seeds per pod; GYP = grain yield per plant; TSW = thousand seed weight; GP = grain protein content.

**Table S4.** Eigenvalue and cumulative variance for the entire collection.

| PC    | Eigenvalue | % of variance | Cum. % of variance |
|-------|------------|---------------|--------------------|
| PC-1  | 4.624      | 46.236        | 46.236             |
| PC-2  | 1.720      | 17.197        | 63.433             |
| PC-3  | 1.426      | 14.257        | 77.690             |
| PC-4  | 0.794      | 7.936         | 85.627             |
| PC-5  | 0.521      | 5.211         | 90.838             |
| PC-6  | 0.396      | 3.962         | 94.800             |
| PC-7  | 0.255      | 2.545         | 97.346             |
| PC-8  | 0.128      | 1.283         | 98.629             |
| PC-9  | 0.072      | 0.716         | 99.345             |
| PC-10 | 0.066      | 0.655         | 100.000            |

Abbreviation: PC = Principal Component.

**Table S5.** Eigenvalue and cumulative variance for *ssp micro*.

| PC    | Eigenvalue | % of variance | Cum. % of variance |
|-------|------------|---------------|--------------------|
| PC-1  | 4.169      | 41.691        | 41.691             |
| PC-2  | 2.078      | 20.776        | 62.467             |
| PC-3  | 1.438      | 14.376        | 76.844             |
| PC-4  | 0.820      | 8.204         | 85.048             |
| PC-5  | 0.637      | 6.368         | 91.416             |
| PC-6  | 0.441      | 4.415         | 95.831             |
| PC-7  | 0.192      | 1.919         | 97.749             |
| PC-8  | 0.108      | 1.077         | 98.827             |
| PC-9  | 0.073      | 0.730         | 99.556             |
| PC-10 | 0.044      | 0.444         | 100.000            |

Abbreviation: PC = Principal Component.

**Table S6.** Eigenvalue and cumulative variance for *ssp macro*.

| PC    | Eigenvalue | % of variance | Cum. % of variance |
|-------|------------|---------------|--------------------|
| PC-1  | 3.996      | 39.956        | 39.956             |
| PC-2  | 1.920      | 19.200        | 59.157             |
| PC-3  | 1.297      | 12.968        | 72.125             |
| PC-4  | 0.961      | 9.610         | 81.735             |
| PC-5  | 0.648      | 6.477         | 88.213             |
| PC-6  | 0.469      | 4.686         | 92.898             |
| PC-7  | 0.313      | 3.128         | 96.026             |
| PC-8  | 0.199      | 1.990         | 98.016             |
| PC-9  | 0.136      | 1.361         | 99.377             |
| PC-10 | 0.062      | 0.623         | 100.000            |

Abbreviation: PC = Principal Component.

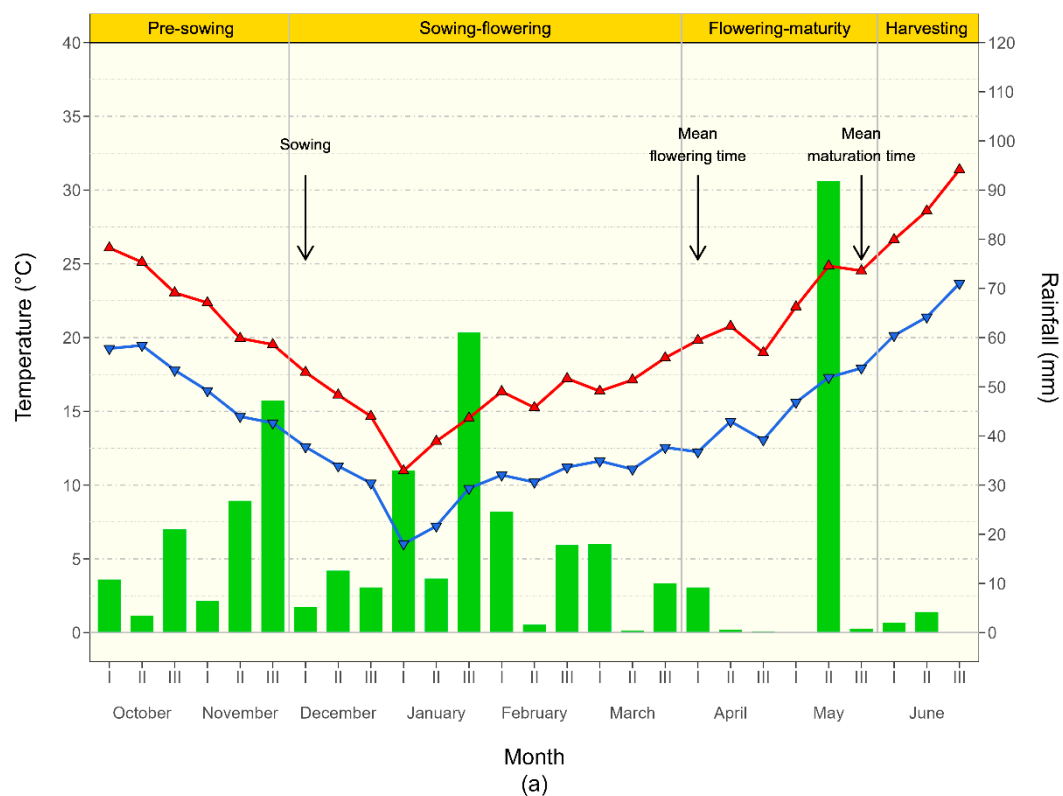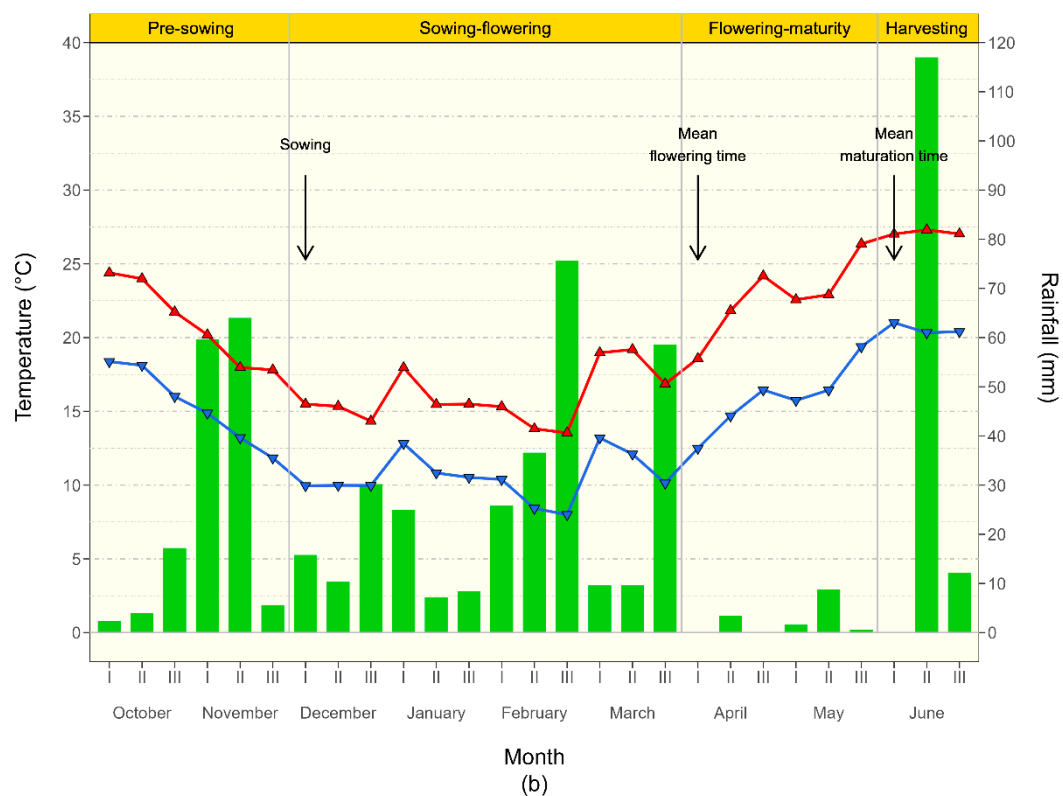

**Figure S1.** Thermo-pluviometric trend in the two growing seasons: (a) 2016/2017; (b) 2017/2018. The three ten-day periods are shown on the x-axis (I, II, III) for each month. Maximum temperatures are shown in red; minimum temperatures are shown in blue; rainfall are represented as green bars. Data are divided by cultivation phases (pre-sowing and harvesting) and plant development stages (sowing-flowering and flowering-maturity). The arrows specify: the sowing time (4<sup>th</sup> of December (a); 7<sup>th</sup> of December (b)); the mean flowering time (2<sup>nd</sup> of April (a); 5<sup>th</sup> of April (b)); the mean maturation time (29<sup>th</sup> of May (a); 3<sup>rd</sup> of June (b)).
